# Supplementary material
Source: publisher site journal article supplement (https://www.dovepress.com/get_supplementary_file.php?f=321642.docx)
Supplement: Supplementary file 1 [file get_supplementary_file.php]

**Appendix 1. *Schematic diagram of mouse experiment***

The main steps in developing the animal model are shown in the diagram.

**Appendix 2. *Thermal cycling program and primer sequences of qPCR***

The following primer sequences were used in PCR:

GAPDH: Forward-5′AGGTCGGTGTGAACGGATTTG3′, Reverse-5′GGGGTCGTTGATGGCAACA3′;

Atg-5: Forward-5′TGTGCTTCGAGATGTGTGGTT3′, Reverse-5′GTCAAATAGCTGACTCTTGGCAA3′;

Beclin-1: Forward-5′ATGGAGGGGTCTAAGGCGTC3′, Reverse-5′TCCTCTCCTGAGTTAGCCTCT3′;

LL37: Forward-5′GCTGTGGCGGTCACTATCAC3′, Reverse-5′TGTCTAGGGACTGCTGGTTGA′;

NF-κB: Forward-5′ATGGCAGACGATGATCCCTAC3′, Reverse-5′TGTTGACAGTGGTATTTCTGGTG3′;

LC3B: Forward-5′TTATAGAGCGATACAAGGGGGAG3′, Reverse-5′CGCCGTCTGATTATCTTGATGAG3′.

The thermal cycling program of qPCR was as follows:

Step 1: 30 sec at 95°C, Step 2: 40 cycles of 5 sec at 95°C, 30 sec at 60°C (depending upon the primer annealing temperatures) and 30 sec at 72°C. Real-time PCR was carried out using 10 individual samples in duplicate and the threshold cycle values were averaged. Calculation of relative normalized gene expression was done using the BioRad CFX manager software based on the ΔΔCt method. Relative gene expression was normalized to that of glyceraldehyde-3-phosphate dehydrogenase (GAPDH). The results were calculated as relative quantification values (RQ).

**Table 1. *Body weights of mice***

|  |  | 8 weeks |  |  |  | 12 weeks |  |
| --- | --- | --- | --- | --- | --- | --- | --- |
|  | Total | Male | Female |  | Total | Male | Female |
| NVD (g) | 22.59±3.28 (n=11) | 24.26±2.34 (n=6) | 20.23±1.60 (n=5) |  | 26.31±3.85 (n=7) | 29.25±1.10 (n=4) | 22.38±1.48 (n=3) |
| LVD (g) | 22.37±3.04 (n=12) | 25.10±2.19 (n=5) | 20.42±1.76 (n=7) |  | 27.06±4.84 (n=8) | 31.20±1.84 (n=4) | 22.92±2.34 (n=4) |
| HVD (g) | 22.32±3.32 (n=12) | 24.69±2.90 (n=6) | 19.95±1.55 (n=6) |  | 26.43±3.82 (n=9) | 29.19±2.14 (n=5) | 22.98±2.42 (n=4) |
| NVD+OVA (g) | 22.55±3.34 (n=10) | 25.11±2.17 (n=5) | 19.98±2.00 (n=5) |  | 27.06±3.95 (n=7) | 29.68±2.69 (n=4) | 23.57±2.02 (n=3) |
| LVD+OVA (g) | 23.04±3.83 (n=10) | 26.18±2.57 (n=5) | 19.90±1.32 (n=5) |  | 25.91±4.27 (n=7) | 28.53±3.30 (n=4) | 22.42±2.54 (n=3) |
| HVD+OVA (g) | 22.59±3.50 (n=10) | 25.01±2.94 (n=5) | 20.17±2.06 (n=5) |  | 26.57±2.78 (n=7) | 28.65±1.18 (n=4) | 23.78±0.89 (n=3) |
| Data were expressed as mean ± SD | | |  |  |  |  |  |
| There is no statistical difference in body weight among the six groups at 8 weeks old or 12 weeks old (*P* > 0.05)  There was no significant difference in the proportion of male and female offspring among the groups (*P* > 0.05) | | | | | | | |
